# Supplementary material for: Efficient Visible Light Photocatalytic Oxidation of NO on F‐ and N‐Codoped Spherical TiO2 Synthesized via Ultrasonic Spray Pyrolysis
Source: Hindawi journal article supplement (doi:10.1155/2012/753429), 2012-01-01
Supplement: f1 [file 753429.f1.docx]

The sentence of “The broken F-doped TiO2 microspheres images of the Figure S1 (a) indicate that the sample prepared sample without adding urea have a hollow structure. While the broken N,F-codoped TiO2 microspheres images of the Figure S1 (b) show that the codoped samples are composed of solid spheres.” is added in the revised supplementary material.

**SI:**

Figure S1 The magnified FSEM images of F-doped TiO2 (a) and F, N codoped TiO2 (b)**.**


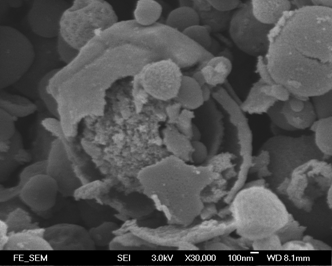


**500 nm**


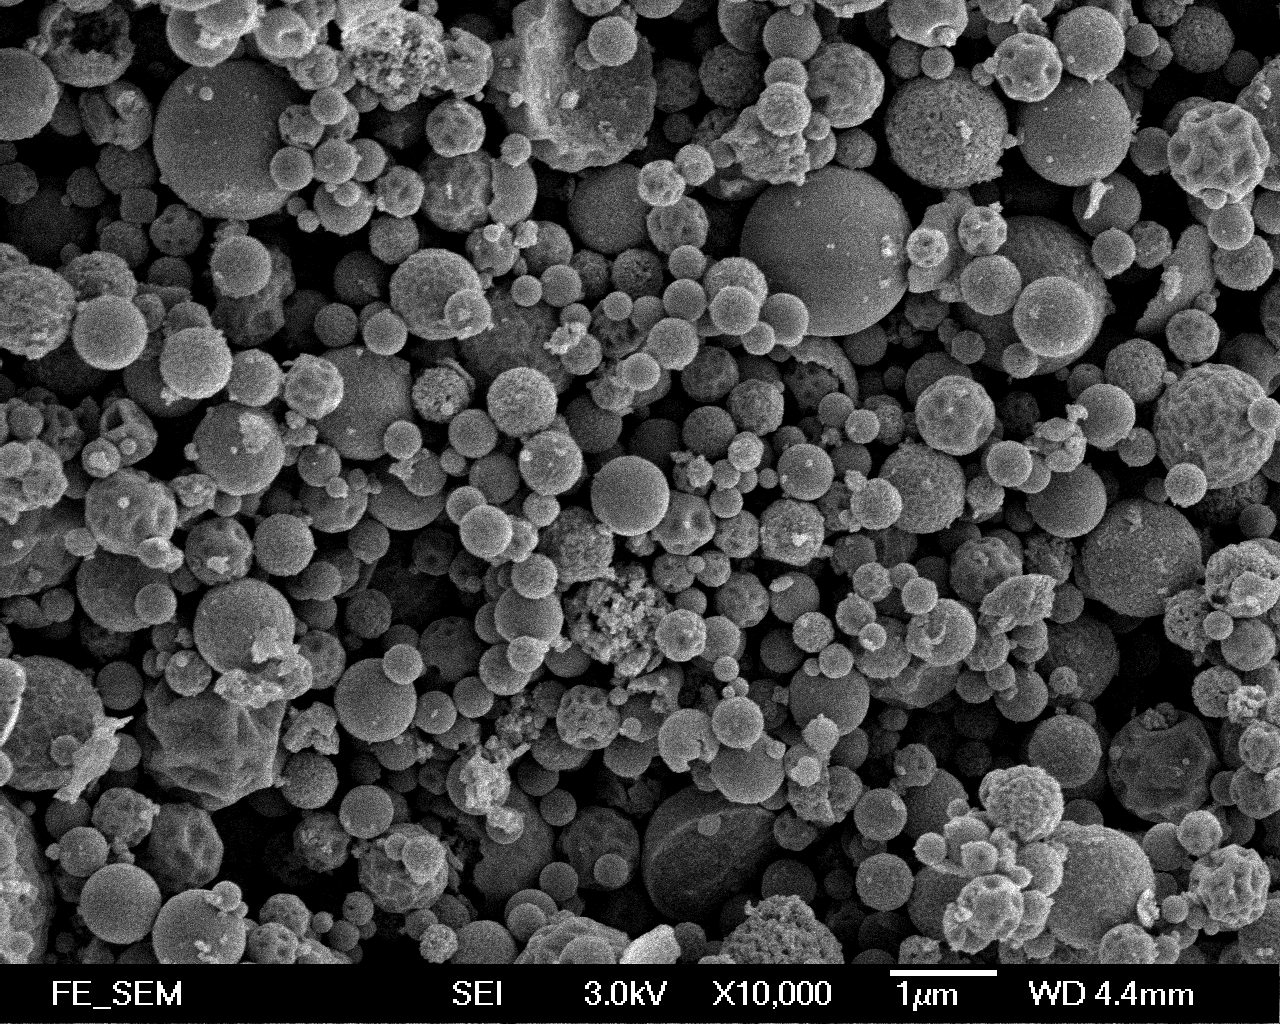


**500 nm**

The broken F-doped TiO2 microspheres images of the Figure S1 (a) indicate that the sample prepared sample without adding urea have a hollow structure. While the broken N,F-codoped TiO2 microspheres images of the Figure S1 (b) show that the codoped samples are composed of solid spheres.
